# Supplementary material for: Interprofessional collaboration and associated factors among wound, ostomy, and continence nurses: a cross-sectional study in China
Source: PeerJ. 2025 Sep 30;13:e20006. doi: 10.7717/peerj.20006 (PMC12493770; doi:10.7717/peerj.20006)
Supplement: Supplemental Information 1 [file peerj-13-20006-s001.xlsx]

## Sheet: Raw data
	male=1（11,4.5%）female=2（236,95.5%）	≤35（79,32%） 36-40（83,33.6%） 41-45（40,16.2%） ≥46（45,18.2%）	yes=1（48，19.4%）no=2（199，80.6%）	married=2 229，92.7% unmarried= 18,7.3%	≤5 （123,49.8%）6-10（82,33.2）＞10（42,17%）	primary=2（17，6.9%）Intermediate=3（168，68%）Senior=4（62，25.1%）	no=1（154，62.3%）nursing manager=2（93，37.7%）	associate’s degree=1（10，4%） bachelor's degree=2,（222，89.9%） master's degree=3（15，6.1%）	tertiary hospital=1(173,70.1%)secondary hospital=2(29,11.7%) Primary hospital=3(45,18.2%)	no=1（92，37.2%）yes=2（155，62.8%）	authorized=1（148，59.9%）contract=2（99，40.1%）	full-time=1（75，30.4%）part-time=2（172，69.6%）	yes=1（98，39.7%）no=2（149，60.3%）		The Chiba Inter-professional competency scale consists of 29 items under six domains: attitudes and beliefs as a professional (6 items), team management skills (5 items), actions for accomplishing team goals (5 items), providing care that respects patients (5 items), attitudes and behaviors that improve team cohesion (4 items), and fulfilling one's role as a professional (4 items). Each item is r…																															The Nursing work environment scale includes 26 items under seven domains: career development (5 items), leadership and management (4 items), doctor-nurse relationship (4 items), recognition (3 items), professional autonomy (4 items), basic security (3 items), and adequate staffing (3 items). Each item is rated on a 6-point Likert scale ranging from 1 (strongly disagree) to 6 (strongly agree)
Number	Gender	Age	Only child	Marital status	Specialty working years	Professional title	Administrative position	Education	Hospital level	Off-site learning experience in the past three years	Employment mode	Work pattern	Serving as a specialty team leader		Total CICS29	T1	T2	T3	T4	T5	T6	T7	T8	T9	T10	T11	T12	T13	T14	T15	T16	T17	T18	T19	T20	T21	T22	T23	T24	T25	T26	T27	T28	T29		Total NWES	T1	T2	T3
1	2	35	2	2	6	3	1	3	1	2	2	1	1		121	5	4	5	4	4	4	4	4	4	4	4	4	4	4	4	4	4	5	4	4	4	4	4	4	5	4	5	5	3		116	6	6	4
2	2	47	2	2	6	4	1	2	1	2	1	1	2		139	5	5	4	5	4	5	5	5	5	5	4	5	5	5	5	5	5	5	4	5	5	5	4	4	5	5	5	5	5		136	6	4	5
3	2	40	2	2	6	3	1	2	1	2	2	1	1		139	5	4	5	5	5	5	5	5	5	5	4	4	5	5	5	5	5	5	5	5	5	4	4	5	5	5	5	4	5		149	6	6	6
4	2	51	2	1	6	4	2	2	2	1	1	2	2		119	4	4	4	5	4	4	4	4	4	4	4	4	4	3	4	4	5	5	5	5	5	4	4	4	4	3	4	3	4		79	4	4	3
5	1	39	2	2	5	3	1	2	3	1	2	1	1		119	5	5	4	4	3	4	4	4	4	4	4	4	4	4	4	4	4	5	4	4	4	4	4	4	4	4	4	5	4		102	4	3	4
6	2	37	2	2	6	2	1	2	3	2	2	1	2		143	5	5	5	5	5	5	5	5	5	5	5	5	5	5	5	5	5	5	5	5	5	5	4	4	5	5	5	5	5		142	6	6	5
7	2	37	2	1	6	3	2	2	3	2	2	1	1		114	3	4	4	4	4	4	3	4	3	4	3	4	4	4	4	4	5	4	4	4	4	5	4	4	4	4	4	4	4		116	5	5	4
8	2	30	2	2	5	2	1	2	2	2	2	1	2		140	5	4	5	5	5	4	5	5	5	5	3	5	5	4	5	5	5	5	5	5	5	5	5	5	5	5	5	5	5		143	4	5	5
9	2	35	2	2	5	3	1	2	2	1	2	2	2		114	3	4	4	5	3	4	3	4	4	4	3	4	4	5	4	3	5	5	5	5	5	4	3	3	4	3	4	4	3		85	3	3	3
10	2	40	2	2	10	3	1	2	1	2	1	1	1		118	4	4	5	5	4	4	4	4	4	4	3	4	4	4	4	4	5	4	4	4	4	4	4	4	4	4	4	4	4		108	4	4	4
11	2	38	2	2	6	3	2	2	1	1	2	2	1		142	5	5	5	5	5	5	5	5	5	5	4	5	5	5	5	5	5	5	5	4	5	5	5	4	5	5	5	5	5		156	6	6	6
12	2	33	2	2	6	3	1	2	1	1	2	2	1		145	5	5	5	5	5	5	5	5	5	5	5	5	5	5	5	5	5	5	5	5	5	5	5	5	5	5	5	5	5		114	5	4	3
13	2	35	2	2	6	2	1	2	2	1	2	1	2		125	4	4	4	5	4	3	4	4	5	4	4	4	5	5	4	4	5	5	5	5	5	3	4	3	5	5	5	4	4		111	5	5	2
14	2	34	1	2	4	3	1	2	1	1	1	2	2		135	4	5	5	5	5	4	4	4	5	4	5	4	4	4	4	4	5	5	5	5	5	5	5	5	5	5	5	5	5		110	4	4	2
15	2	38	2	2	10	3	1	3	1	2	2	2	2		122	5	5	5	5	5	4	4	4	4	4	3	3	4	4	3	4	5	4	5	5	5	4	4	4	4	4	4	4	4		113	5	5	4
16	2	47	2	2	13	3	1	2	1	2	1	1	2		139	5	5	5	5	5	5	5	5	5	5	5	5	5	5	5	5	5	5	5	5	5	2	5	4	4	5	4	5	5		126	5	5	4
17	2	40	2	2	10	4	1	2	1	2	2	1	2		144	5	5	5	5	5	5	5	5	5	5	5	5	5	5	5	4	5	5	5	5	5	5	5	5	5	5	5	5	5		156	6	6	6
18	2	37	2	2	4	3	1	2	1	1	2	2	2		115	4	4	4	4	4	4	4	3	4	4	3	4	4	4	4	4	5	4	4	4	4	4	4	4	4	4	4	4	4		88	4	5	2
19	2	33	2	2	9	3	1	2	1	2	2	1	2		112	4	4	4	4	4	3	4	4	4	4	3	3	3	4	4	4	5	4	4	4	4	4	4	4	4	4	4	3	4		110	4	3	4
20	2	35	2	2	2	3	1	2	1	1	1	2	2		122	4	5	5	5	5	5	5	5	4	4	4	3	4	4	4	4	4	4	4	4	4	4	4	4	4	4	4	4	4		134	6	6	6
21	2	32	2	2	1	3	1	2	1	1	1	2	2		145	5	5	5	5	5	5	5	5	5	5	5	5	5	5	5	5	5	5	5	5	5	5	5	5	5	5	5	5	5		155	6	6	6
22	2	52	2	2	12	3	1	2	1	1	1	1	2		133	5	5	5	5	5	4	5	4	4	4	4	5	4	4	5	4	5	5	5	5	5	4	4	4	5	5	5	5	4		119	4	5	5
23	2	45	2	2	9	4	2	2	1	2	1	2	1		145	5	5	5	5	5	5	5	5	5	5	5	5	5	5	5	5	5	5	5	5	5	5	5	5	5	5	5	5	5		149	6	4	6
24	2	48	2	2	10	4	2	2	1	2	1	2	2		145	5	5	5	5	5	5	5	5	5	5	5	5	5	5	5	5	5	5	5	5	5	5	5	5	5	5	5	5	5		137	5	5	5
25	2	34	2	2	6	3	1	2	1	2	1	1	2		126	4	4	4	4	4	4	4	5	4	4	4	4	5	5	4	5	5	5	5	5	5	4	4	4	5	4	4	4	4		135	6	5	6
26	2	51	2	2	13	4	2	2	1	2	1	1	1		141	5	5	5	5	4	5	5	5	5	5	4	5	5	5	5	5	4	5	4	5	5	5	5	5	5	5	5	5	5		122	5	2	5
27	2	38	2	2	3	3	1	2	1	2	1	2	2		136	5	5	5	5	4	4	5	5	4	5	5	5	5	5	5	5	5	4	5	5	5	4	4	4	5	5	4	4	5		136	6	6	6
28	2	37	2	2	7	3	1	2	1	1	1	1	2		140	5	5	5	5	5	5	5	5	5	5	4	5	4	4	4	4	5	5	5	5	5	5	5	5	5	5	5	5	5		130	5	5	5
29	2	42	2	2	7	3	2	2	1	2	1	2	1		145	5	5	5	5	5	5	5	5	5	5	5	5	5	5	5	5	5	5	5	5	5	5	5	5	5	5	5	5	5		131	6	5	5
30	2	46	2	2	11	4	2	2	2	2	1	1	1		144	5	5	5	5	5	5	4	5	5	5	5	5	5	5	5	5	5	5	5	5	5	5	5	5	5	5	5	5	5		126	5	5	5
31	2	43	2	2	5	3	1	2	1	2	1	2	2		111	4	4	4	4	4	4	4	4	4	4	4	4	4	4	4	4	4	4	4	4	4	4	4	3	3	3	3	3	4		129	5	5	5
32	2	40	2	2	10	3	1	2	1	2	2	2	1		116	3	3	3	4	4	5	4	4	4	4	4	3	3	4	4	4	5	5	4	5	5	3	4	4	5	4	3	4	5		91	4	5	3
33	2	49	2	2	8	3	1	3	1	2	1	2	2		138	4	5	5	5	5	5	5	4	5	5	4	5	5	5	5	5	5	5	5	5	5	5	4	4	4	4	5	5	5		122	4	4	2
34	2	32	2	2	5	3	1	2	1	2	1	2	2		120	4	4	4	5	4	4	4	4	4	4	4	4	4	4	4	4	5	4	5	4	5	4	4	4	4	4	4	4	4		120	5	4	4
35	2	45	1	1	7	3	1	2	1	1	1	1	1		126	4	4	4	5	5	4	5	4	4	5	4	4	4	4	4	4	4	5	4	4	4	5	5	4	5	5	4	5	4		114	5	4	4
36	2	60	2	2	13	4	2	2	1	2	1	2	2		135	5	3	5	5	5	4	5	5	5	3	5	4	5	5	5	5	5	5	5	5	5	4	4	5	4	4	5	5	5		123	5	5	4
37	2	36	2	1	6	3	1	2	1	1	2	2	2		125	5	4	5	5	4	4	4	5	4	4	3	5	5	4	4	4	5	5	4	5	5	4	4	3	5	4	4	4	4		125	5	4	4
38	2	35	1	2	3	3	1	2	1	2	1	2	1		128	4	4	4	5	5	4	5	5	4	4	4	4	5	5	5	3	4	5	5	4	5	4	5	4	4	5	5	4	4		98	5	4	3
39	2	41	2	2	12	3	1	3	1	2	1	1	2		139	5	5	5	5	5	5	5	5	5	4	4	5	5	5	5	5	5	5	4	5	5	4	4	4	5	5	5	5	5		134	6	6	6
40	2	53	2	2	9	4	2	2	1	2	1	2	1		139	5	5	5	5	5	5	5	5	5	5	1	5	5	5	5	5	5	5	5	5	5	5	3	5	5	5	5	5	5		147	6	6	6
41	2	37	2	2	5	3	1	2	1	2	1	1	1		145	5	5	5	5	5	5	5	5	5	5	5	5	5	5	5	5	5	5	5	5	5	5	5	5	5	5	5	5	5		126	5	4	4
42	2	47	2	2	14	3	1	2	1	2	1	1	2		145	5	5	5	5	5	5	5	5	5	5	5	5	5	5	5	5	5	5	5	5	5	5	5	5	5	5	5	5	5		141	5	5	3
43	2	53	2	2	16	4	2	2	3	2	1	1	1		145	5	5	5	5	5	5	5	5	5	5	5	5	5	5	5	5	5	5	5	5	5	5	5	5	5	5	5	5	5		116	5	5	4
44	2	33	2	2	2	3	1	2	1	1	1	2	2		129	5	4	4	4	5	5	4	5	5	5	4	4	4	4	4	4	5	4	4	4	5	4	4	4	5	5	5	5	5		147	5	6	4
45	2	36	1	1	1	3	1	2	1	1	1	1	2		105	5	5	5	4	3	3	3	4	4	4	3	3	3	3	3	3	4	4	4	4	4	4	3	3	3	3	3	4	4		113	5	4	4
46	2	35	1	2	6	3	2	2	1	2	1	1	2		144	5	5	5	5	5	5	5	5	5	5	5	5	5	5	5	5	5	5	5	5	5	5	5	5	5	5	4	5	5		153	6	6	6
47	2	41	1	1	7	4	2	2	1	2	1	2	1		143	5	5	5	5	4	5	5	5	5	5	4	5	5	5	5	5	5	5	5	5	5	5	5	5	5	5	5	5	5		126	4	5	5
48	2	37	2	2	7	3	1	2	1	2	1	1	1		142	5	5	5	5	5	5	5	5	5	5	5	5	5	5	5	5	4	4	4	5	5	5	5	5	5	5	5	5	5		155	6	6	6
49	1	30	2	2	5	3	1	2	1	1	1	1	1		145	5	5	5	5	5	5	5	5	5	5	5	5	5	5	5	5	5	5	5	5	5	5	5	5	5	5	5	5	5		130	5	5	5
50	2	43	1	1	6	3	1	2	1	1	1	1	1		145	5	5	5	5	5	5	5	5	5	5	5	5	5	5	5	5	5	5	5	5	5	5	5	5	5	5	5	5	5		143	6	6	6
51	2	50	2	2	12	4	2	2	1	2	1	2	1		131	4	5	5	5	4	4	4	5	4	4	4	5	5	5	5	5	5	5	5	4	4	4	4	4	5	4	5	5	4		101	4	3	2
52	2	40	1	2	5	3	2	2	1	1	1	2	2		128	4	4	4	5	4	4	4	4	4	4	4	4	4	4	4	4	5	5	5	5	5	4	5	5	5	5	5	5	4		152	6	6	6
53	2	52	2	2	15	4	1	2	1	1	1	1	2		124	4	4	5	5	4	5	4	5	4	4	4	4	4	4	5	5	4	4	5	5	5	4	3	4	4	4	4	4	4		109	5	3	3
54	2	35	2	2	5	3	2	2	2	2	1	2	1		143	5	5	5	5	4	5	4	5	5	5	5	5	5	5	5	5	5	5	5	5	5	5	5	5	5	5	5	5	5		142	6	6	6
55	1	33	2	2	10	3	2	2	1	2	2	2	2		145	5	5	5	5	5	5	5	5	5	5	5	5	5	5	5	5	5	5	5	5	5	5	5	5	5	5	5	5	5		154	5	5	6
56	2	51	2	2	13	4	2	2	1	2	1	2	2		145	5	5	5	5	5	5	5	5	5	5	5	5	5	5	5	5	5	5	5	5	5	5	5	5	5	5	5	5	5		154	6	6	6
57	2	44	1	2	3	4	1	2	1	2	2	2	1		116	4	4	4	4	4	4	4	4	4	4	4	4	4	4	4	4	4	4	4	4	4	4	4	4	4	4	4	4	4		90	2	2	2
58	2	42	2	2	11	3	1	2	1	2	1	1	1		135	5	5	5	5	4	4	5	5	5	4	4	4	4	5	5	4	5	5	4	5	5	4	4	5	5	5	5	5	5		122	5	5	5
59	2	37	2	2	4	3	1	2	1	2	2	2	2		140	5	5	5	5	5	5	4	5	5	4	4	5	5	5	5	5	5	5	5	5	5	5	4	5	5	4	5	5	5		121	4	5	4
60	2	46	2	2	14	3	1	2	2	2	2	2	1		137	4	4	5	5	5	5	5	5	4	5	5	5	5	4	5	4	5	5	5	5	5	5	5	4	5	4	5	5	4		114	4	5	3
61	2	43	2	2	5	4	2	2	1	1	1	1	1		144	5	5	5	5	4	5	5	5	5	5	5	5	5	5	5	5	5	5	5	5	5	5	5	5	5	5	5	5	5		107	3	2	2
62	2	40	1	2	11	3	1	2	3	2	2	1	1		142	5	5	5	5	4	5	5	5	4	4	5	5	5	5	5	5	5	5	5	5	5	5	5	5	5	5	5	5	5		107	6	3	3
63	2	37	1	2	10	4	2	2	1	2	2	2	1		126	4	5	5	5	4	5	5	4	4	4	4	4	4	4	4	4	5	5	5	4	5	4	4	4	4	4	4	4	5		130	5	5	5
64	2	41	2	2	6	4	1	2	1	1	3	1	1		113	3	4	4	4	4	4	4	4	4	4	3	4	4	4	4	4	4	4	4	4	4	4	4	4	4	4	4	3	4		69	2	2	2
65	2	53	2	2	13	4	2	2	1	2	1	2	1		138	5	5	5	5	4	5	5	4	5	4	4	4	5	5	5	5	5	5	5	5	5	5	5	5	4	5	5	5	4		130	6	5	5
66	2	48	2	2	12	4	2	3	1	1	1	2	1		129	5	5	5	5	4	4	5	5	5	4	4	5	5	5	4	4	4	4	5	5	4	4	4	4	4	4	5	4	4		118	4	5	3
67	2	34	2	2	1	3	1	2	1	1	1	2	2		137	4	4	5	4	4	4	4	5	5	5	4	5	5	5	5	5	5	5	5	5	5	5	5	5	5	5	4	5	5		126	5	5	5
68	1	33	1	2	12	3	1	2	1	1	2	1	2		115	3	4	4	4	4	4	4	4	4	4	4	4	4	4	4	4	4	4	4	4	4	4	4	4	4	4	4	4	4		95	4	2	2
69	2	50	2	1	10	4	1	1	1	2	1	1	1		142	5	5	5	5	5	5	5	5	5	2	5	5	5	5	5	5	5	5	5	5	5	5	5	5	5	5	5	5	5		96	3	3	3
70	2	55	2	2	12	4	2	2	1	2	1	2	1		143	5	5	5	5	5	5	5	5	5	5	4	5	4	5	5	5	5	5	5	5	5	5	5	5	5	5	5	5	5		113	5	4	2
71	2	53	2	2	12	4	2	2	1	2	1	2	2		145	5	5	5	5	5	5	5	5	5	5	5	5	5	5	5	5	5	5	5	5	5	5	5	5	5	5	5	5	5		152	6	6	6
72	2	46	2	2	10	3	1	2	1	1	2	1	1		136	4	4	4	4	4	5	5	5	5	5	5	5	5	4	4	4	4	5	5	5	5	5	5	5	5	5	5	5	5		124	5	4	5
73	2	50	2	2	11	4	2	2	1	2	1	2	1		142	5	5	5	5	5	4	4	5	4	5	5	5	5	5	5	5	5	5	5	5	5	5	5	5	5	5	5	5	5		143	6	6	5
74	2	37	1	2	7	3	2	2	1	2	1	2	1		128	5	5	5	5	4	4	4	4	4	4	4	3	4	4	4	4	5	5	5	5	5	4	4	4	5	5	5	5	4		121	4	3	3
75	2	41	1	2	15	3	1	2	1	2	2	2	2		145	5	5	5	5	5	5	5	5	5	5	5	5	5	5	5	5	5	5	5	5	5	5	5	5	5	5	5	5	5		143	6	6	6
76	2	50	2	2	17	4	1	2	2	2	1	1	2		145	5	5	5	5	5	5	5	5	5	5	5	5	5	5	5	5	5	5	5	5	5	5	5	5	5	5	5	5	5		130	5	5	5
77	2	40	2	2	8	3	1	2	2	1	1	2	1		142	5	5	5	5	5	5	5	5	5	5	4	5	5	4	5	5	5	5	5	5	5	5	5	5	5	5	5	5	4		134	5	3	4
78	2	35	2	2	10	3	1	2	1	2	2	2	2		137	4	5	5	5	5	4	4	5	4	4	4	5	4	4	5	5	5	5	5	5	5	5	5	5	5	5	5	5	5		139	5	4	5
79	2	38	1	2	15	3	1	2	1	2	1	1	2		140	5	5	5	5	5	5	5	5	5	4	4	4	5	5	5	5	5	5	5	5	5	5	5	5	3	5	5	5	5		131	5	5	4
80	2	41	2	2	8	4	2	2	2	2	2	2	1		142	4	4	5	5	5	5	5	5	5	4	5	5	5	5	5	5	5	5	5	5	5	5	5	5	5	5	5	5	5		127	5	4	5
81	2	54	2	2	2	4	1	2	1	1	1	2	2		102	4	4	4	4	3	3	4	3	4	4	4	4	3	3	3	4	4	3	4	4	4	3	3	3	4	3	3	3	3		98	2	3	3
82	2	39	1	2	10	3	2	2	2	2	1	2	2		124	5	4	5	5	5	5	5	5	5	5	4	4	4	4	3	4	4	4	4	4	4	4	4	4	4	4	4	4	4		131	5	5	5
83	2	46	2	2	5	3	1	1	1	2	1	1	1		129	4	4	4	4	4	4	4	4	4	4	4	4	4	4	4	4	5	5	5	5	5	5	5	5	5	5	5	5	5		129	5	5	5
84	2	37	1	2	5	3	1	2	3	1	1	2	1		144	5	5	5	5	5	5	5	5	4	5	5	5	5	5	5	5	5	5	5	5	5	5	5	5	5	5	5	5	5		142	3	3	4
85	2	35	1	2	7	3	1	2	1	2	2	2	2		136	5	4	5	5	5	4	4	4	5	5	5	5	5	5	5	5	5	5	5	4	4	5	4	5	5	5	5	4	4		138	6	6	6
86	2	39	1	2	5	3	1	2	1	1	2	2	1		141	5	4	5	5	5	4	4	4	5	5	5	5	5	5	5	5	5	5	5	5	5	5	5	5	5	5	5	5	5		131	6	4	5
87	2	51	2	2	7	4	2	2	2	1	1	2	1		135	5	5	5	4	5	4	5	5	5	5	4	5	5	5	5	4	5	5	5	4	5	4	4	5	4	5	5	4	4		144	6	6	5
88	2	37	2	2	8	3	1	2	1	2	2	1	1		131	5	4	5	5	5	4	5	5	4	4	4	4	4	4	4	5	5	5	5	5	5	5	5	4	5	4	4	4	4		131	5	5	5
89	2	36	1	2	5	3	2	2	3	2	2	2	2		139	4	5	5	5	5	4	5	5	5	5	4	5	5	5	4	5	5	5	5	5	5	5	5	5	5	4	5	4	5		119	6	4	4
90	2	52	2	2	8	4	1	1	2	2	1	1	1		145	5	5	5	5	5	5	5	5	5	5	5	5	5	5	5	5	5	5	5	5	5	5	5	5	5	5	5	5	5		124	6	3	5
91	2	48	1	2	11	3	1	1	2	2	1	2	1		120	4	4	5	4	4	4	4	4	4	4	4	4	4	4	4	4	5	4	4	4	5	4	4	3	4	4	5	5	4		100	3	3	3
92	2	46	2	2	11	4	2	2	1	1	1	1	1		140	5	5	5	5	4	4	5	5	5	5	5	5	5	5	4	4	4	5	5	5	5	5	5	5	5	5	5	5	5		126	5	3	5
93	2	37	2	2	10	3	1	2	1	1	1	1	2		131	4	5	5	5	5	5	5	5	5	5	4	4	4	4	4	4	5	5	5	5	5	4	4	4	4	5	4	4	4		136	6	6	6
94	2	41	2	2	6	4	2	2	1	2	1	2	1		144	5	5	5	5	5	4	5	5	5	5	5	5	5	5	5	5	5	5	5	5	5	5	5	5	5	5	5	5	5		130	5	5	5
95	2	43	2	2	10	3	1	2	1	2	1	2	2		144	5	5	5	5	5	4	5	5	5	5	5	5	5	5	5	5	5	5	5	5	5	5	5	5	5	5	5	5	5		112	6	3	3
96	2	33	1	2	6	2	2	2	3	2	2	2	2		137	5	5	5	4	4	5	4	4	5	4	4	5	5	5	5	5	4	5	4	5	5	5	5	5	5	5	5	5	5		130	6	6	6
97	2	40	2	2	4	3	2	2	1	2	1	2	1		141	5	5	5	5	5	5	5	5	5	4	4	5	5	5	5	5	5	5	4	5	5	5	5	5	5	5	5	5	4		135	6	5	5
98	2	29	2	1	2	2	2	2	3	2	2	2	2		125	4	5	5	5	4	4	5	4	5	5	4	4	4	4	4	4	5	3	5	5	5	3	3	3	5	4	5	5	4		114	3	1	3
99	2	39	2	2	9	3	2	2	1	2	2	2	1		134	5	5	5	5	5	5	5	5	5	4	4	4	5	4	5	5	5	5	5	5	4	4	4	4	4	5	4	5	4		141	5	6	6
100	2	39	2	2	8	3	2	2	2	2	1	2	2		145	5	5	5	5	5	5	5	5	5	5	5	5	5	5	5	5	5	5	5	5	5	5	5	5	5	5	5	5	5		152	6	6	6
101	2	48	2	2	10	4	2	2	3	2	1	2	1		140	5	5	5	5	5	5	5	5	4	4	4	4	5	5	5	5	5	4	5	5	5	5	5	5	5	5	5	5	5		107	5	4	4
102	2	36	2	2	5	4	1	2	1	2	2	2	1		114	4	4	5	4	4	4	4	4	4	2	2	4	4	4	4	3	5	5	4	4	4	4	4	4	4	4	4	4	4		114	5	5	5
103	2	40	2	2	10	3	1	2	1	2	2	2	2		145	5	5	5	5	5	5	5	5	5	5	5	5	5	5	5	5	5	5	5	5	5	5	5	5	5	5	5	5	5		137	5	6	5
104	2	46	2	2	12	4	2	2	2	2	1	1	1		132	5	5	5	5	4	4	4	4	4	4	4	4	4	5	5	5	5	5	5	5	4	4	4	4	5	5	5	5	5		127	5	5	5
105	2	47	1	2	1	3	1	2	3	2	1	2	2		116	4	4	4	4	4	4	4	4	4	4	4	4	4	4	4	4	4	4	4	4	4	4	4	4	4	4	4	4	4		116	5	4	5
106	2	50	2	2	12	4	2	2	1	2	1	1	1		133	5	4	5	5	5	5	5	5	4	4	4	4	4	4	4	5	5	5	5	4	4	5	5	4	5	5	4	5	5		130	5	6	6
107	2	43	1	2	3	3	1	2	1	1	2	2	2		144	5	4	5	5	5	5	5	5	5	5	5	5	5	5	5	5	5	5	5	5	5	5	5	5	5	5	5	5	5		156	6	6	6
108	2	33	2	2	3	2	1	2	1	2	2	2	2		121	5	5	5	4	4	4	5	5	4	4	4	4	4	4	4	4	4	4	4	4	4	4	4	4	4	4	4	4	4		116	5	5	5
109	2	51	2	2	9	4	2	2	2	2	1	2	1		144	5	5	5	5	4	5	5	5	5	5	5	5	5	5	5	5	5	5	5	5	5	5	5	5	5	5	5	5	5		140	5	4	5
110	2	46	2	2	2	4	2	2	3	1	1	1	2		139	4	4	4	4	5	5	5	5	5	5	5	5	4	5	5	4	5	5	5	5	5	5	5	5	5	5	5	5	5		124	3	4	4
111	2	41	1	2	2	3	1	2	1	1	1	2	2		145	5	5	5	5	5	5	5	5	5	5	5	5	5	5	5	5	5	5	5	5	5	5	5	5	5	5	5	5	5		139	6	6	4
112	2	43	2	2	5	4	2	2	1	2	1	2	2		144	5	5	5	5	5	5	5	5	5	5	5	5	5	5	5	4	5	5	5	5	5	5	5	5	5	5	5	5	5		151	6	6	6
113	2	49	2	2	10	4	2	2	3	2	1	2	1		143	5	5	5	5	4	5	5	5	5	5	4	5	5	5	5	5	5	5	5	5	5	5	5	5	5	5	5	5	5		151	6	6	6
114	2	50	1	2	8	3	1	2	1	1	1	1	2		116	4	4	4	4	4	4	4	4	4	4	4	4	4	4	4	4	4	4	4	4	4	4	4	4	4	4	4	4	4		129	5	4	5
115	2	34	2	2	5	3	1	2	1	2	1	2	2		141	5	5	5	5	5	5	5	5	5	5	5	5	5	5	5	5	5	5	5	5	5	5	4	5	5	4	4	4	5		148	6	6	6
116	2	43	1	2	7	3	1	2	1	2	1	1	2		144	5	5	5	5	5	5	5	5	5	5	5	5	5	5	5	5	5	5	5	5	5	5	5	4	5	5	5	5	5		135	6	6	6
117	2	46	2	2	5	4	2	2	1	2	1	2	2		143	5	5	5	5	5	4	5	5	5	5	4	5	5	5	5	5	5	5	5	5	5	5	5	5	5	5	5	5	5		133	6	5	5
118	2	37	2	2	1	3	1	3	1	1	2	2	2		145	5	5	5	5	5	5	5	5	5	5	5	5	5	5	5	5	5	5	5	5	5	5	5	5	5	5	5	5	5		154	6	6	6
119	2	42	2	2	8	3	2	2	1	1	1	2	1		145	5	5	5	5	5	5	5	5	5	5	5	5	5	5	5	5	5	5	5	5	5	5	5	5	5	5	5	5	5		141	6	6	5
120	2	31	1	2	1	3	1	2	1	1	2	1	2		145	5	5	5	5	5	5	5	5	5	5	5	5	5	5	5	5	5	5	5	5	5	5	5	5	5	5	5	5	5		156	6	6	6
121	2	34	2	2	3	3	2	2	1	2	1	2	2		134	4	4	5	5	5	5	4	4	4	4	4	4	4	4	5	4	5	5	5	5	5	5	5	5	5	5	5	5	5		109	5	4	3
122	2	36	2	2	7	3	1	2	1	1	1	2	1		127	4	4	4	4	5	5	5	5	5	5	4	4	4	5	5	5	5	5	5	5	5	5	2	2	4	4	4	4	4		127	5	4	4
123	2	42	1	2	10	4	2	2	1	2	1	2	1		139	5	4	5	5	5	5	5	4	4	4	4	5	5	5	5	5	4	5	5	5	5	5	5	5	5	5	5	5	5		155	6	6	6
124	2	45	2	2	8	3	2	2	3	1	1	2	2		129	5	5	5	5	5	5	4	4	5	5	4	4	4	4	4	4	4	5	5	4	4	4	4	4	5	4	5	5	4		128	5	4	4
125	2	44	2	2	5	3	1	2	1	2	1	1	1		130	4	5	5	5	4	4	5	4	4	4	4	5	4	4	5	4	5	5	5	5	5	4	4	4	5	4	5	5	4		97	5	2	2
126	1	40	1	2	5	3	1	2	1	2	1	2	2		115	4	4	4	4	4	4	4	4	4	4	4	4	4	4	4	4	4	4	4	4	4	4	4	4	4	4	4	3	4		123	5	4	4
127	2	47	2	2	3	4	2	2	3	1	1	2	2		131	5	5	5	5	3	4	5	5	5	4	4	4	4	4	5	4	4	5	5	5	5	5	4	4	5	5	5	4	4		117	5	5	5
128	2	35	2	2	8	3	1	2	1	2	2	2	2		143	5	5	5	5	5	4	5	5	5	5	4	5	5	5	5	5	5	5	5	5	5	5	5	5	5	5	5	5	5		136	6	6	4
129	2	37	2	2	3	3	1	2	1	1	1	2	2		116	4	4	4	4	4	4	4	4	4	4	4	4	4	4	4	4	4	4	4	4	4	4	4	4	4	4	4	4	4		105	4	5	4
130	2	34	2	2	2	3	1	2	3	2	1	2	1		110	3	4	5	5	4	4	4	4	4	3	3	4	4	3	4	3	4	4	4	4	5	3	3	3	4	4	4	4	3		96	4	3	3
131	2	41	2	2	1	3	1	2	2	1	3	2	2		133	4	2	5	5	5	4	4	4	5	5	4	4	4	4	5	4	5	5	5	5	5	5	5	5	5	5	5	5	5		131	6	6	6
132	2	33	1	2	3	3	1	2	3	1	1	1	2		138	5	5	5	5	4	4	5	5	4	5	4	5	5	5	5	5	5	5	5	5	5	5	5	4	4	4	5	5	5		129	6	4	5
133	2	30	1	2	9	3	1	2	2	2	2	1	1		144	5	5	5	5	5	5	5	5	5	5	4	5	5	5	5	5	5	5	5	5	5	5	5	5	5	5	5	5	5		138	5	4	3
134	2	40	2	2	2	3	1	2	1	1	1	2	2		135	5	4	5	5	5	4	5	5	5	4	4	4	5	5	4	4	5	5	5	5	5	5	5	4	5	5	4	5	4		137	6	5	5
135	2	42	2	2	13	3	2	2	1	2	1	2	1		145	5	5	5	5	5	5	5	5	5	5	5	5	5	5	5	5	5	5	5	5	5	5	5	5	5	5	5	5	5		131	6	6	4
136	2	38	2	2	16	3	1	2	1	2	1	1	2		142	4	5	5	5	5	5	5	5	5	5	5	5	5	5	4	5	5	5	5	5	5	5	5	5	5	5	5	4	5		153	6	6	6
137	2	30	2	1	9	3	2	2	3	2	3	2	2		141	4	5	5	5	5	5	5	5	5	4	4	5	5	5	5	4	5	5	5	5	5	5	5	5	5	5	5	5	5		151	6	6	6
138	2	28	2	1	1	3	1	2	1	2	2	2	2		142	5	5	5	5	5	5	5	5	5	5	4	5	5	5	5	5	5	5	5	5	5	5	5	5	5	5	5	4	4		156	6	6	6
139	2	40	2	2	1	3	1	1	2	2	2	1	2		145	5	5	5	5	5	5	5	5	5	5	5	5	5	5	5	5	5	5	5	5	5	5	5	5	5	5	5	5	5		155	6	6	6
140	2	40	2	2	2	3	2	2	1	1	1	2	1		121	4	4	5	4	4	4	4	4	4	4	5	3	4	4	4	4	5	5	4	5	4	4	4	5	4	4	4	4	4		99	3	4	3
141	2	33	1	2	1	3	1	2	1	1	2	2	2		96	5	3	3	4	4	4	3	2	4	5	3	4	2	4	4	3	3	3	3	3	3	3	3	3	3	3	3	3	3		109	4	4	4
142	2	38	1	2	2	3	1	2	1	2	1	2	2		137	4	5	5	5	5	5	5	5	5	5	3	4	4	4	4	4	5	5	5	5	5	5	5	5	5	5	5	5	5		103	5	5	5
143	2	34	2	2	1	3	2	2	1	1	2	1	2		145	5	5	5	5	5	5	5	5	5	5	5	5	5	5	5	5	5	5	5	5	5	5	5	5	5	5	5	5	5		145	6	6	6
144	2	30	2	2	1	3	2	2	3	2	2	2	1		125	3	5	4	5	5	5	5	4	5	4	3	4	5	4	4	4	4	5	5	5	5	5	4	4	4	4	4	3	4		123	3	6	4
145	2	33	2	2	1	3	2	2	1	1	1	2	2		144	5	5	5	5	5	5	5	5	5	5	5	4	5	5	5	5	5	5	5	5	5	5	5	5	5	5	5	5	5		125	6	5	5
146	2	33	1	1	3	3	1	2	1	2	2	2	2		121	4	4	4	5	5	4	5	5	5	4	4	4	4	4	4	4	4	4	4	4	4	4	4	4	4	4	4	4	4		103	5	4	3
147	1	39	2	2	2	4	1	2	1	2	1	2	2		140	5	5	5	5	5	5	5	5	5	5	5	5	5	5	4	4	5	5	5	5	5	4	4	5	5	5	5	5	4		126	6	5	4
148	2	38	1	2	3	3	1	2	1	2	2	1	1		145	5	5	5	5	5	5	5	5	5	5	5	5	5	5	5	5	5	5	5	5	5	5	5	5	5	5	5	5	5		136	6	4	5
149	2	32	1	2	6	3	1	2	2	2	2	2	2		127	5	5	5	5	5	5	5	5	5	5	4	4	4	4	4	4	5	4	4	4	4	4	4	4	4	4	4	4	4		129	5	5	5
150	2	32	1	2	2	3	2	2	2	2	2	2	2		119	4	4	5	5	4	4	5	4	4	4	4	4	4	4	4	4	4	4	4	4	4	4	4	4	4	4	4	4	4		130	5	5	5
151	2	41	2	2	5	4	2	2	2	2	1	2	2		132	3	4	5	5	5	4	4	5	5	4	5	4	4	5	5	5	5	5	5	5	5	4	4	5	4	4	5	5	4		140	6	6	6
152	2	39	2	2	3	3	2	2	1	2	2	2	2		140	5	5	5	5	5	5	5	5	5	5	2	4	5	5	5	5	5	4	5	5	5	5	5	5	5	5	5	5	5		129	5	3	4
153	2	33	2	2	3	3	2	2	3	2	2	2	1		145	5	5	5	5	5	5	5	5	5	5	5	5	5	5	5	5	5	5	5	5	5	5	5	5	5	5	5	5	5		149	6	4	5
154	2	35	2	2	3	3	1	2	1	1	1	1	2		125	5	5	5	5	4	4	5	5	4	4	4	4	4	4	4	4	5	5	5	4	4	4	4	4	4	4	4	4	4		124	5	5	4
155	2	37	2	2	2	3	2	2	3	1	1	2	2		140	5	5	5	5	5	5	4	5	5	4	4	4	5	4	5	5	5	5	5	5	5	5	5	5	5	5	5	5	5		136	6	2	5
156	2	37	2	2	3	3	2	2	2	1	1	2	1		142	5	5	5	5	5	4	5	5	5	5	4	4	5	5	5	5	5	5	5	5	5	5	5	5	5	5	5	5	5		129	5	3	5
157	2	34	2	2	3	3	1	2	1	2	2	2	2		145	5	5	5	5	5	5	5	5	5	5	5	5	5	5	5	5	5	5	5	5	5	5	5	5	5	5	5	5	5		156	6	6	6
158	2	35	1	2	2	3	1	2	3	1	1	1	1		145	5	5	5	5	5	5	5	5	5	5	5	5	5	5	5	5	5	5	5	5	5	5	5	5	5	5	5	5	5		85	6	2	2
159	2	40	2	1	3	3	1	1	3	1	2	2	2		143	5	5	5	5	5	5	5	5	5	5	4	4	5	5	5	5	5	5	5	5	5	5	5	5	5	5	5	5	5		113	4	4	5
160	1	33	2	2	2	3	2	3	3	2	1	2	2		138	4	4	4	5	5	4	4	4	5	5	5	5	5	5	5	5	5	5	5	5	5	5	5	5	5	5	5	5	4		128	5	4	4
161	2	34	2	2	5	3	1	2	1	2	1	2	2		128	4	5	5	5	4	4	4	4	5	4	4	4	4	4	4	4	5	5	5	5	5	4	4	4	4	4	5	5	5		116	4	4	4
162	2	43	2	2	4	3	1	2	1	1	2	1	2		116	5	5	5	5	4	5	2	4	1	5	5	1	1	1	1	2	5	5	5	5	5	5	5	5	5	5	4	5	5		70	4	1	1
163	2	41	2	2	10	4	2	2	1	2	1	2	2		139	5	5	5	5	5	4	5	5	4	4	4	5	5	5	5	5	5	5	5	5	5	5	5	4	5	4	5	5	5		122	5	4	4
164	2	32	2	2	3	3	1	2	1	2	2	2	1		134	5	5	5	5	5	5	5	5	4	4	4	4	4	4	4	4	4	5	5	5	5	5	5	5	4	5	5	5	4		124	6	6	5
165	2	41	2	2	2	3	1	2	1	1	3	2	2		145	5	5	5	5	5	5	5	5	5	5	5	5	5	5	5	5	5	5	5	5	5	5	5	5	5	5	5	5	5		152	6	5	6
166	2	35	2	2	3	3	1	2	3	1	2	2	2		128	5	4	5	5	4	4	5	5	5	4	2	4	4	5	4	4	5	5	5	4	5	4	4	4	5	4	5	5	4		147	6	5	5
167	2	29	2	1	2	2	1	2	1	1	1	2	2		112	4	4	4	4	4	4	4	4	4	4	4	4	4	4	4	4	4	4	3	4	4	3	3	3	4	4	4	4	4		112	5	5	5
168	2	34	2	2	4	3	1	2	1	2	2	1	2		140	5	5	5	5	5	5	5	5	5	5	5	4	4	4	4	4	5	5	5	5	5	5	5	5	5	5	5	5	5		140	6	5	5
169	2	37	2	2	5	3	1	2	1	1	2	2	2		121	4	4	4	4	4	4	4	4	4	4	4	4	4	4	4	4	5	4	5	4	5	5	4	4	5	4	4	4	4		108	5	5	5
170	2	42	2	2	7	4	1	2	1	1	1	2	2		120	5	5	5	5	4	5	4	4	4	4	3	4	4	4	4	4	4	4	4	4	4	4	4	4	4	4	4	4	4		145	6	6	6
171	2	40	2	2	2	3	1	2	1	2	2	2	2		128	5	4	5	4	5	5	5	4	5	5	5	5	4	4	4	4	4	4	4	4	4	4	4	4	4	4	5	5	5		144	6	6	6
172	2	43	2	2	3	4	2	2	1	2	1	2	2		145	5	5	5	5	5	5	5	5	5	5	5	5	5	5	5	5	5	5	5	5	5	5	5	5	5	5	5	5	5		128	5	5	5
173	2	46	1	2	5	3	2	2	3	2	1	1	1		144	5	5	5	5	5	5	5	5	5	5	4	5	5	5	5	5	5	5	5	5	5	5	5	5	5	5	5	5	5		146	6	6	6
174	2	40	2	2	10	3	2	2	1	2	1	2	1		143	5	5	5	5	5	5	5	5	5	4	4	5	5	5	5	5	5	5	5	5	5	5	5	5	5	5	5	5	5		123	6	5	5
175	2	39	2	2	19	4	1	2	1	2	2	2	2		144	5	5	5	5	5	5	5	5	5	4	5	5	5	5	5	5	5	5	5	5	5	5	5	5	5	5	5	5	5		95	6	5	4
176	2	32	2	2	3	3	1	2	1	2	1	2	1		142	5	5	5	5	5	5	5	5	5	5	5	4	5	5	5	5	5	5	5	5	5	5	5	4	4	5	5	5	5		151	6	6	5
177	2	32	2	2	6	3	1	2	1	2	1	1	2		145	5	5	5	5	5	5	5	5	5	5	5	5	5	5	5	5	5	5	5	5	5	5	5	5	5	5	5	5	5		151	6	6	6
178	2	35	2	2	3	3	1	3	1	2	1	1	2		121	5	5	5	5	4	4	4	4	5	4	4	4	4	4	4	4	4	4	4	4	4	4	4	4	4	4	4	4	4		116	4	5	4
179	2	35	2	2	10	3	2	2	1	2	1	2	2		145	5	5	5	5	5	5	5	5	5	5	5	5	5	5	5	5	5	5	5	5	5	5	5	5	5	5	5	5	5		149	6	6	6
180	2	50	2	2	17	4	1	2	1	1	1	1	2		137	5	5	5	5	4	4	4	4	4	4	3	5	5	5	5	5	5	5	5	5	5	5	5	5	5	5	5	5	5		137	5	5	5
181	2	35	2	2	1	3	1	2	1	1	1	2	2		144	5	5	5	5	5	5	5	5	5	5	4	5	5	5	5	5	5	5	5	5	5	5	5	5	5	5	5	5	5		138	6	6	5
182	2	34	2	2	4	3	1	2	1	2	1	2	2		114	4	4	4	4	4	4	4	4	4	4	3	3	4	4	4	4	4	4	4	4	4	4	4	4	4	4	4	4	4		97	5	5	3
183	2	50	2	2	20	4	2	2	1	2	1	1	1		144	5	5	5	5	5	5	5	5	5	5	5	5	5	5	5	5	5	5	5	5	5	5	5	5	4	5	5	5	5		111	4	5	2
184	2	37	2	2	1	3	1	3	1	2	1	2	2		144	5	5	5	5	5	5	5	5	5	5	4	5	5	5	5	5	5	5	5	5	5	5	5	5	5	5	5	5	5		156	6	6	6
185	2	38	2	1	6	3	1	2	1	2	1	2	2		112	4	4	4	4	4	4	4	4	4	4	4	4	4	4	4	4	4	3	4	4	4	3	3	4	4	3	4	4	4		102	4	6	4
186	2	41	1	2	7	3	1	2	1	1	1	2	2		145	5	5	5	5	5	5	5	5	5	5	5	5	5	5	5	5	5	5	5	5	5	5	5	5	5	5	5	5	5		129	5	5	4
187	1	41	1	2	14	4	1	2	1	1	2	1	2		123	3	4	5	5	5	5	4	4	4	4	4	4	4	4	4	4	3	4	4	5	5	5	4	4	4	5	4	4	5		93	4	4	3
188	2	36	2	2	4	3	2	2	1	1	2	2	2		129	4	4	4	4	4	4	4	4	4	4	4	4	4	4	4	4	5	5	5	5	5	5	5	5	5	5	5	5	5		131	6	5	5
189	2	37	2	2	1	3	1	2	3	1	1	2	2		128	5	5	5	5	4	4	4	4	4	4	4	4	4	4	4	4	5	5	5	5	5	5	4	5	5	4	4	4	4		115	5	3	2
190	2	40	1	1	5	4	2	2	1	2	2	2	2		145	5	5	5	5	5	5	5	5	5	5	5	5	5	5	5	5	5	5	5	5	5	5	5	5	5	5	5	5	5		151	6	4	5
191	2	32	2	2	7	3	1	3	1	2	1	2	2		144	5	5	5	5	4	5	5	5	5	5	5	5	5	5	5	5	5	5	5	5	5	5	5	5	5	5	5	5	5		145	6	6	5
192	2	47	2	2	13	4	2	2	1	2	1	2	1		138	5	4	5	5	4	4	5	4	4	4	4	5	5	5	5	5	5	5	5	5	5	5	5	5	5	5	5	5	5		126	6	6	6
193	2	36	2	2	18	2	1	2	3	1	2	1	2		142	5	5	5	5	5	5	5	5	5	4	4	4	5	5	5	5	5	5	5	5	5	5	5	5	5	5	5	5	5		146	6	6	6
194	2	30	2	2	6	3	1	2	3	2	1	2	1		145	5	5	5	5	5	5	5	5	5	5	5	5	5	5	5	5	5	5	5	5	5	5	5	5	5	5	5	5	5		140	5	6	4
195	2	40	2	2	2	4	1	2	2	2	1	2	2		144	5	5	5	5	5	5	5	5	5	5	4	5	5	5	5	5	5	5	5	5	5	5	5	5	5	5	5	5	5		140	6	6	5
196	2	34	2	2	1	2	1	1	3	1	2	2	2		119	5	5	4	5	4	4	4	4	4	4	4	4	4	4	4	4	4	4	4	4	4	4	4	4	4	4	4	4	4		109	5	4	2
197	2	37	2	2	2	3	2	2	3	1	1	2	1		145	5	5	5	5	5	5	5	5	5	5	5	5	5	5	5	5	5	5	5	5	5	5	5	5	5	5	5	5	5		137	6	6	6
198	2	32	2	2	5	3	2	2	2	2	2	1	1		145	5	5	5	5	5	5	5	5	5	5	5	5	5	5	5	5	5	5	5	5	5	5	5	5	5	5	5	5	5		150	6	5	5
199	1	35	2	2	6	3	1	2	1	1	2	2	2		124	4	4	4	5	4	5	5	5	5	5	3	5	5	4	4	4	4	4	4	5	4	4	4	4	4	4	4	4	4		94	5	5	5
200	2	46	2	2	6	4	2	2	1	1	1	2	1		114	4	4	4	5	4	4	4	4	4	3	3	4	4	4	4	4	4	4	4	4	4	4	3	4	4	4	4	4	4		116	5	5	5
201	2	39	2	2	8	3	2	2	1	2	2	2	1		145	5	5	5	5	5	5	5	5	5	5	5	5	5	5	5	5	5	5	5	5	5	5	5	5	5	5	5	5	5		129	5	5	5
202	2	37	2	2	1	2	1	2	3	1	3	2	2		114	3	4	5	5	4	2	4	4	4	4	3	4	4	4	4	4	4	4	4	4	4	4	4	4	4	4	4	4	4		89	5	3	2
203	2	37	2	2	7	3	2	2	1	1	1	2	1		133	5	4	5	5	5	4	4	5	4	4	4	4	4	4	4	4	5	5	4	5	5	5	5	5	5	5	5	5	5		128	6	5	5
204	2	37	2	2	3	3	1	2	3	1	2	1	1		145	5	5	5	5	5	5	5	5	5	5	5	5	5	5	5	5	5	5	5	5	5	5	5	5	5	5	5	5	5		116	3	3	4
205	2	27	2	2	1	2	1	2	1	1	2	2	2		145	5	5	5	5	5	5	5	5	5	5	5	5	5	5	5	5	5	5	5	5	5	5	5	5	5	5	5	5	5		115	6	6	6
206	2	34	2	1	2	3	1	2	1	2	2	2	2		136	5	5	5	5	5	5	5	5	5	4	5	5	4	5	5	5	5	5	5	5	5	5	3	4	4	4	4	4	5		95	2	3	3
207	2	33	2	2	2	3	1	2	3	1	1	2	2		142	5	5	5	5	5	5	5	5	5	5	5	5	5	5	5	5	5	5	5	5	5	5	5	5	5	5	5	5	2		135	6	6	6
208	2	32	2	2	1	2	1	2	3	1	2	2	1		137	5	5	5	5	4	4	4	4	4	4	4	4	5	5	5	5	5	5	5	5	5	5	5	5	5	5	5	5	5		107	4	4	4
209	2	35	2	2	3	3	1	2	1	1	2	2	2		131	4	4	5	5	3	4	4	3	4	5	3	3	4	5	5	5	5	5	5	5	5	5	5	5	5	5	5	5	5		121	4	5	4
210	2	36	2	2	5	3	1	2	1	2	2	2	1		133	4	5	5	5	5	5	5	4	3	4	4	5	4	4	5	4	5	5	5	5	5	5	5	4	5	5	4	5	4		123	4	5	4
211	2	41	1	2	5	3	2	1	3	1	1	2	2		119	5	4	4	4	4	4	5	4	4	4	4	4	4	4	4	4	4	5	4	4	4	4	4	4	4	4	4	4	4		115	5	4	4
212	2	37	2	2	14	3	1	2	1	2	2	2	2		113	4	5	5	4	4	3	4	4	4	4	3	4	4	4	4	4	5	4	4	4	4	3	3	4	3	4	4	4	3		116	5	4	4
213	2	37	2	2	4	3	2	2	1	2	2	2	1		144	5	5	5	5	5	5	5	5	5	5	4	5	5	5	5	5	5	5	5	5	5	5	5	5	5	5	5	5	5		156	6	6	6
214	2	38	1	2	1	3	2	3	2	2	1	2	1		120	5	5	5	5	4	4	4	4	4	4	4	4	4	4	4	4	4	4	4	4	4	4	4	4	4	4	4	4	4		146	6	5	5
215	2	43	2	2	4	4	1	2	3	2	1	1	1		145	5	5	5	5	5	5	5	5	5	5	5	5	5	5	5	5	5	5	5	5	5	5	5	5	5	5	5	5	5		152	6	6	6
216	2	31	2	2	12	2	2	1	3	1	2	2	1		144	5	5	5	5	5	5	5	4	5	5	5	5	5	5	5	5	5	5	5	5	5	5	5	5	5	5	5	5	5		156	6	6	6
217	2	30	2	2	2	2	1	2	1	1	2	2	2		138	5	5	5	5	5	4	5	5	5	4	4	5	5	4	5	4	5	5	4	5	5	4	5	5	5	5	5	5	5		141	6	6	4
218	2	37	2	2	2	2	1	2	1	2	2	2	2		144	5	5	5	5	5	5	5	5	5	5	5	5	5	5	5	5	5	5	5	5	5	5	4	5	5	5	5	5	5		139	6	6	4
219	2	32	2	2	3	3	2	2	3	2	1	2	1		140	5	5	5	5	5	5	5	5	4	5	5	5	5	5	5	5	5	5	5	5	5	4	4	4	5	4	5	5	5		146	6	6	6
220	2	31	2	2	1	2	1	2	3	2	2	2	2		142	5	5	5	4	5	4	5	5	5	5	4	5	5	5	5	5	5	5	5	5	5	5	5	5	5	5	5	5	5		140	6	5	5
221	2	33	2	2	1	3	1	2	1	2	1	2	2		115	4	5	5	4	4	4	4	4	4	4	3	3	3	3	3	3	5	4	5	5	4	4	4	4	4	4	4	4	4		114	5	5	4
222	2	38	2	2	5	3	1	2	1	2	2	2	1		124	5	5	5	5	4	4	5	5	5	5	2	3	4	4	4	4	5	5	4	4	5	4	4	4	4	4	4	4	4		141	6	4	5
223	2	45	2	2	2	4	2	2	3	2	1	2	2		142	5	5	5	5	5	5	5	5	4	5	4	5	5	5	5	4	5	5	5	5	5	5	5	5	5	5	5	5	5		137	6	2	5
224	2	36	2	2	5	3	1	2	1	1	2	2	1		131	5	5	5	5	5	5	5	5	5	5	5	4	5	5	5	5	4	4	4	4	4	4	4	4	4	4	4	4	4		108	5	5	4
225	2	34	2	2	11	3	1	2	1	1	2	1	2		143	5	5	5	5	5	5	5	5	5	5	4	4	5	5	5	5	5	5	5	5	5	5	5	5	5	5	5	5	5		148	6	6	5
226	2	31	2	2	5	3	2	2	1	2	1	2	2		140	4	4	5	5	5	4	5	5	5	5	5	5	5	5	5	5	5	5	5	5	5	5	4	5	5	5	5	4	5		125	6	6	6
227	2	37	2	2	1	3	1	2	3	2	2	2	2		145	5	5	5	5	5	5	5	5	5	5	5	5	5	5	5	5	5	5	5	5	5	5	5	5	5	5	5	5	5		114	4	3	4
228	2	30	2	2	1	2	1	2	1	1	2	2	2		136	5	5	5	5	5	4	5	5	5	5	4	4	4	3	4	4	5	5	5	5	5	5	4	5	5	5	5	5	5		120	6	6	6
229	2	34	2	2	5	3	1	2	1	1	2	2	2		141	5	5	5	5	5	4	5	5	5	5	4	5	5	5	5	5	5	5	5	5	5	5	5	5	5	5	5	4	4		142	5	5	6
230	2	40	2	2	14	4	2	2	1	2	1	2	1		130	5	5	4	5	5	5	5	5	5	5	4	5	5	5	5	5	4	4	4	4	4	4	4	4	4	4	4	4	4		71	2	4	2
231	2	40	2	2	2	4	2	2	2	2	2	2	1		138	5	5	5	5	5	5	5	5	5	4	4	5	5	5	5	5	5	5	5	5	5	4	5	4	4	5	5	4	4		118	5	2	4
232	2	41	2	2	11	3	1	3	1	2	1	1	2		139	5	5	5	5	5	5	5	5	4	4	4	5	5	4	5	5	5	5	4	5	5	5	5	5	5	5	5	5	4		140	6	6	6
233	2	40	2	2	8	3	1	2	2	2	1	2	1		140	5	5	5	5	5	5	5	5	5	4	4	5	5	5	5	5	5	5	5	4	3	5	5	5	5	5	5	5	5		151	6	5	4
234	2	35	1	2	5	3	1	2	1	2	1	2	2		144	4	5	5	5	5	5	5	5	5	5	5	5	5	5	5	5	5	5	5	5	5	5	5	5	5	5	5	5	5		156	6	6	6
235	2	36	2	2	11	3	1	2	1	2	1	1	2		134	5	5	5	5	5	5	5	5	5	5	4	4	4	2	4	4	5	5	5	5	5	4	4	5	5	5	5	5	4		99	5	6	3
236	2	36	1	2	6	3	2	2	1	1	1	2	1		144	5	5	5	5	5	5	5	5	5	5	4	5	5	5	5	5	5	5	5	5	5	5	5	5	5	5	5	5	5		128	5	4	5
237	2	40	2	2	5	3	2	2	1	2	2	2	1		139	4	4	5	5	5	4	5	5	5	4	4	4	5	5	5	5	5	5	5	5	5	5	5	5	5	5	5	5	5		109	3	4	3
238	1	36	2	2	6	3	2	3	3	2	1	2	1		145	5	5	5	5	5	5	5	5	5	5	5	5	5	5	5	5	5	5	5	5	5	5	5	5	5	5	5	5	5		134	5	5	5
239	1	36	2	2	16	3	1	2	1	2	1	1	2		128	4	4	5	5	4	4	4	4	5	4	4	4	4	5	5	5	5	5	5	5	4	4	4	4	4	4	4	5	5		130	5	5	5
240	2	41	2	1	6	3	1	1	3	2	2	1	2		130	5	5	5	5	5	4	4	4	4	4	4	4	4	4	4	4	4	5	5	5	5	5	5	5	5	4	4	5	4		98	6	3	3
241	2	30	2	2	7	3	1	3	1	1	2	2	2		125	3	3	4	4	4	4	4	5	4	4	4	4	4	5	4	5	5	5	4	5	5	5	5	4	4	4	4	5	5		114	4	5	4
242	2	35	2	2	2	3	2	2	3	1	1	2	2		123	5	4	4	4	5	4	5	5	5	4	4	4	4	4	4	4	5	5	4	4	4	4	4	4	4	4	4	4	4		116	6	4	4
243	2	33	2	2	0.5	3	1	2	1	1	2	2	2		145	5	5	5	5	5	5	5	5	5	5	5	5	5	5	5	5	5	5	5	5	5	5	5	5	5	5	5	5	5		145	6	6	6
244	2	36	2	2	7	3	2	2	1	2	2	2	1		143	5	5	5	5	5	4	5	5	5	5	5	5	5	5	5	5	4	5	5	5	5	5	5	5	5	5	5	5	5		126	6	5	4
245	2	45	2	2	5	4	1	2	1	2	1	1	2		140	5	5	5	5	4	5	5	5	5	5	4	5	5	5	4	5	5	5	5	5	5	5	5	5	5	5	5	4	4		127	5	5	4
246	2	43	2	2	8	4	2	3	1	2	1	2	2		107	3	4	4	4	4	3	3	3	3	3	3	3	4	4	4	3	4	4	4	4	4	4	4	4	4	4	4	4	4		112	5	5	4
247	2	39	1	2	7	4	2	2	1	1	1	2	2		145	5	5	5	5	5	5	5	5	5	5	5	5	5	5	5	5	5	5	5	5	5	5	5	5	5	5	5	5	5		156	6	6	6
															140
															145
															125
															144
															141
															142
															125
															112
															145
															145
															138
															136
															125
															135.615
															10.096
															121
															114
															145
															125
															135
															112
															122
															145
															126
															120
															128
															129
															144
															143
															145
															137
															115
															137
															136
															137
															121
															141
															145
															134
															143
															110
															138
															96
															145
															144
															121
															127
															119
															145
															125
															145
															145
															138
															128
															134
															128
															140
															142
															145
															121
															145
															144
															114
															144
															119
															145
															124
															136
															142
															137
															131
															144
															140
															142
															115
															143
															140
															141
															144
															123
															145
															133.242
		121
		140
		114
		145
		125
		135
		112
		122
		145
		126
		120
		128
		129
		144
		145
		143
		145
		137
		115
		137
		136
		137
		125
		121
		141
		145
		134
		143
		110
		138
		144
		141
		142
		96
		145
		125
		144
		121
		127
		119
		145
		125
		145
		145
		138
		128
		134
		128
		112
		140
		142
		145
		121
		145
		144
		114
		144
		145
		119
		145
		124
		145
		136
		142
		137
		131
		144
		138
		140
		142
		115
		143
		140
		136
		141
		144
		125
		123
		145
		133.633
		11.3897
		139	121	121	119
		119	139	139	140
		143	139	139	114
		114	119	119	135
		118	119	143	115
		142	143	140	122
		122	114	114	145
		144	140	118	136
		115	114	142	111
		136	118	145	120
		140	142	125	128
		116	145	135	145
		125	125	122	129
		145	122	139	105
		105	139	144	145
		142	144	115	128
		128	115	112	143
		140	112	122	116
		142	122	145	140
		126	145	133	144
		128	133	145	137
		142	145	145	102
		140	145	126	129
		124	126	141	144
		144	141	136	141
		141	136	140	139
		131	140	145	141
		139	145	144	125
		131	144	111	114
		141	111	116	116
		134	116	138	144
		145	138	120	121
		114	120	135	139
		145	135	128	145
		145	125	139	144
		127	139	139	141
		115	139	145	143
		116	145	145	145
		135	145	145	145
		142	145	129	134
		145	129	144	130
		121	142	142	115
		137	145	145	131
		140	131	131	116
		145	124	128	110
		140	143	124	133
		140	145	143	138
		142	145	145	135
		143	135	145	142
		121	140	116	145
		128	137	135	121
		143	144	140	96
		144	113	137	137
		144	138	144	145
		112	129	142	125
		129	137	126	144
		128	142	113	121
		145	143	138	140
		142	145	129	145
		144	136	137	119
		145	142	115	132
		145	145	143	140
		114	142	145	145
		133	137	136	125
		145	142	142	140
		133	102	128	142
		113	129	145	145
		144	135	145	145
		120	131	142	143
		144	145	137	138
		124	140	140	128
		131	131	142	116
		145	144	102	134
		130	144	124	145
		138	141	129	128
		140	125	144	112
		134	134	136	140
		144	145	141	121
		139	140	135	128
		145	114	131	145
		128	145	139	144
		143	132	145	142
		145	133	120	121
		134.157	121	140	144
		10.8311	144	131	114
			139	144	144
		145	144	144	129
		145	143	137	128
		111	141	141	145
		126	143	134	144
		139	145	145	119
		143	145	140	145
		145	134	114	145
		116	127	145	114
		135	129	132	145
		144	130	116	145
		113	131	133	136
		145	143	144	142
		142	116	121	137
		144	110	144	131
		144	133	139	133
		144	135	145	119
		145	145	144	144
		144	142	143	120
		144	141	116	145
		145	142	141	138
		139	145	144	144
		129	121	143	140
		130	145	145	142
		133	125	145	115
		145	144	145	124
		132	140	134	142
		116	132	127	131
		139	140	139	140
		145	145	129	145
		120	125	130	136
		145	140	115	141
		145	142	131	138
		123	145	143	144
		119	143	116	139
		145	138	110	123
		142	128	133	145
		139	116	138	140
		130	139	144	133.26
		140	134	135	11.7852
		107	145	145
		135.55	128	142
		11.3973	112	145
			140	121
		139	121	96
		119	120	137
		139	128	145
		133	145	125
		145	143	144
		141	144	140
		144	142	145
		138	145	127
		135	121	119
		139	145	132
		145	137	140
		145	144	145
		131	114	125
		124	144	140
		145	144	142
		137	112	145
		138	129	145
		129	128	138
		142	144	128
		143	138	116
		145	142	139
		136	145	134
		142	144	145
		145	119	128
		102	145	140
		129	145	121
		135	124	120
		145	114	128
		120	145	145
		140	114	144
		140	133	143
		132	145	144
		116	145	142
		133	136	145
		144	142	121
		139	137	145
		143	131	137
		116	133	144
		143	113	114
		131	144	144
		144	145	144
		137	144	145
		144	138	123
		138	144	129
		114	140	128
		135.644	142	144
		9.95134	115	138
			124	142
			142	145
			131	144
			143	119
			140	145
			145	145
			136	124
			141	114
			130	145
			138	114
			139	133
			140	145
			134	145
			139	142
			145	137
			128	131
			130	133
			125	119
			123	113
			145	144
			143	120
			140	145
			107	144
			134.905	138
			10.5147	144
				140
			135	142
			126	115
			128	124
			105	142
			144	131
			143	143
			145	140
			128	145
			116	136
			142	141
			126	130
			115	138
			128	139
			145	140
			140	144
			124	134
			144	144
			136	139
			141	145
			139	128
			120	125
			137	123
			116	145
			144	143
			145	140
			116	107
			144	145
			145	134.9
			139	10.707
			115
			138	119
			144	114
			96	126
			137	125
			121	105
			145	143
			127	145
			119	142
			145	125
			144	141
			145	142
			123	121
			145	143
			119	112
			120	112
			144	145
			144	136
			145	130
			132.75	129.222
			12.607	12.951
					121
					139
					139
					119
					143
					114
					118
					142
					145
					125
					122
					144
					112
					145
					145
					126
					140
					145
					116
					138
					126
					125
					139
					144
					143
					142
					145
					126
					113
					142
					136
					128
					142
					137
					142
					124
					136
					135
					131
					145
					131
					144
					144
					137
					134
					145
					140
					145
					144
					143
					116
					144
					145
					127
					139
					129
					143
					144
					141
					127
					139
					120
					143
					145
					145
					112
					145
					144
					145
					124
					114
					145
					133
					140
					144
					145
					130
					125
					143
					107
					145
					134.988
					10.7111
[truncated: 43 more columns]

## Sheet: Sheet2
A	B	C	D	E	F
121	116	88	2	1	1
139	136	87	2	1	2
139	149	76	2	1	1
119	79	70	1	2	2
119	102	76	1	1	1
143	142	85	2	1	2
114	116	74	2	2	1
140	143	84	2	1	2
114	85	76	1	1	2
118	108	67	2	1	1
142	156	91	1	2	1
145	114	84	1	1	1
125	111	81	1	1	2
135	110	86	1	1	2
122	113	78	2	1	2
139	126	73	2	1	2
144	156	82	2	1	2
115	88	74	1	1	2
112	110	72	2	1	2
122	134	83	1	1	2
145	155	87	1	1	2
133	119	75	1	1	2
145	149	87	2	2	1
145	137	87	2	2	2
126	135	87	2	1	2
141	122	88	2	2	1
136	136	80	2	1	2
140	130	84	1	1	2
145	131	88	2	2	1
144	126	74	2	2	1
111	129	70	2	1	2
116	91	71	2	1	1
138	122	82	2	1	2
120	120	75	2	1	2
126	114	86	1	1	1
135	123	74	2	2	2
125	125	82	1	1	2
128	98	84	2	1	1
139	134	90	2	1	2
139	147	81	2	2	1
145	126	85	2	1	1
145	141	79	2	1	2
145	116	84	2	2	1
129	147	85	1	1	2
105	113	69	1	1	2
144	153	86	2	2	2
143	126	79	2	2	1
142	155	82	2	1	1
145	130	84	1	1	1
145	143	85	1	1	1
131	101	76	2	2	1
128	152	84	1	2	2
124	109	70	1	1	2
143	142	83	2	2	1
145	154	89	2	2	2
145	154	84	2	2	2
116	90	84	2	1	1
135	122	86	2	1	1
140	121	87	2	1	2
137	114	78	2	1	1
144	107	87	1	2	1
142	107	80	2	1	1
126	130	80	2	2	1
113	69	71	1	1	1
138	130	85	2	2	1
129	118	76	1	2	1
137	126	83	1	1	2
115	95	71	1	1	2
142	96	89	2	1	1
143	113	77	2	2	1
145	152	86	2	2	2
136	124	75	1	1	1
142	143	83	2	2	1
128	121	81	2	2	1
145	143	81	2	1	2
145	130	83	2	1	2
142	134	83	1	1	1
137	139	81	2	1	2
140	131	81	2	1	2
142	127	73	2	2	1
102	98	66	1	1	2
124	131	70	2	2	2
129	129	83	2	1	1
144	142	83	1	1	1
136	138	89	2	1	2
141	131	85	1	1	1
135	144	86	1	2	1
131	131	80	2	1	1
139	119	87	2	2	2
145	124	86	2	1	1
120	100	75	2	1	1
140	126	89	1	2	1
131	136	89	1	1	2
144	130	79	2	2	1
144	112	87	2	1	2
137	130	82	2	2	2
141	135	83	2	2	1
125	114	87	2	2	2
134	141	66	2	2	1
145	152	87	2	2	2
140	107	78	2	2	1
114	114	75	2	1	1
145	137	86	2	1	2
132	127	72	2	2	1
116	116	76	2	1	2
133	130	72	2	2	1
144	156	83	1	1	2
121	116	71	2	1	2
144	140	87	2	2	1
139	124	78	1	2	2
145	139	85	1	1	2
144	151	90	2	2	2
143	151	90	2	2	1
116	129	70	1	1	2
141	148	80	2	1	2
144	135	78	2	1	2
143	133	89	2	2	2
145	154	88	1	1	2
145	141	83	1	2	1
145	156	87	1	1	2
134	109	89	2	2	2
127	127	79	1	1	1
139	155	83	2	2	1
129	128	81	1	2	2
130	97	85	2	1	1
115	123	70	2	1	2
131	117	83	1	2	2
143	136	89	2	1	2
116	105	63	1	1	2
110	96	80	2	1	1
133	131	84	1	1	2
138	129	85	1	1	2
144	138	84	2	1	1
135	137	84	1	1	2
145	131	83	2	2	1
142	153	88	2	1	2
141	151	83	2	2	2
142	156	84	2	1	2
145	155	82	2	1	2
121	99	71	1	2	1
96	109	66	1	1	2
137	103	81	2	1	2
145	145	87	1	2	2
125	123	77	2	2	1
144	125	77	1	2	2
121	103	71	2	1	2
140	126	78	2	1	2
145	136	86	2	1	1
127	129	70	2	1	2
119	130	70	2	2	2
132	140	85	2	2	2
140	129	83	2	2	2
145	149	82	2	2	1
125	124	82	1	1	2
140	136	83	1	2	2
142	129	79	1	2	1
145	156	82	2	1	2
145	85	83	1	1	1
143	113	83	1	1	2
138	128	82	2	2	2
128	116	72	2	1	2
116	70	82	1	1	2
139	122	86	2	2	2
134	124	86	2	1	1
145	152	84	1	1	2
128	147	79	1	1	2
112	112	72	1	1	2
140	140	79	2	1	2
121	108	76	1	1	2
120	145	80	1	1	2
128	144	77	2	1	2
145	128	88	2	2	2
144	146	80	2	2	1
143	123	87	2	2	1
144	95	83	2	1	2
142	151	90	2	1	1
145	151	82	2	1	2
121	116	70	2	1	2
145	149	89	2	2	2
137	137	83	1	1	2
144	138	81	1	1	2
114	97	74	2	1	2
144	111	75	2	2	1
144	156	89	2	1	2
112	102	78	2	1	2
145	129	88	1	1	2
123	93	81	1	1	2
129	131	85	1	2	2
128	115	88	1	1	2
145	151	84	2	2	2
144	145	85	2	1	2
138	126	89	2	2	1
142	146	83	1	1	2
145	140	85	2	1	1
144	140	87	2	1	2
119	109	84	1	1	2
145	137	82	1	2	1
145	150	83	2	2	1
124	94	65	1	1	2
114	116	71	1	2	1
145	129	85	2	2	1
114	89	72	1	1	2
133	128	82	1	2	1
145	116	89	1	1	1
145	115	91	1	1	2
136	95	83	2	1	2
142	135	81	1	1	2
137	107	84	1	1	1
131	121	83	1	1	2
133	123	72	2	1	1
119	115	82	1	2	2
113	116	79	2	1	2
144	156	88	2	2	1
120	146	83	2	2	1
145	152	82	2	1	1
144	156	81	1	2	1
138	141	82	1	1	2
144	139	85	2	1	2
140	146	86	2	2	1
142	140	84	2	1	2
115	114	77	2	1	2
124	141	78	2	1	1
142	137	82	2	2	2
131	108	69	1	1	1
143	148	83	1	1	2
140	125	86	2	2	2
145	114	84	2	1	2
136	120	90	1	1	2
141	142	88	1	1	2
130	71	83	2	2	1
138	118	84	2	2	1
139	140	87	2	1	2
140	151	85	2	1	1
144	156	84	2	1	2
134	99	75	2	1	2
144	128	78	1	2	1
139	109	88	2	2	1
145	134	83	2	2	1
128	130	65	2	1	2
130	98	80	2	1	2
125	114	80	1	1	2
123	116	79	1	2	2
145	145	83	1	1	2
143	126	87	2	2	1
140	127	80	2	1	2
107	112	72	2	2	2
145	156	81	1	2	2

## Sheet: Sheet3
D	院外交流	无=1	有=2
E	职务	护士=1	护士长=2
F	组长	是=1	否=2
